# Supplementary material for: Improved mechanical and fatigue properties of graphene oxide/silica/SBR composites
Source: Royal Society of Chemistry journal article supplement (doi:10.1039/c7ra06635j), 2017-01-01
Supplement: c7ra06635j1.pdf [file c7ra06635j1.pdf]

## Supporting Information

### Improved mechanical and fatigue properties of graphene

#### oxide/silica/SBR composites

Songbo Zhang<sup>a</sup>, Long Zheng<sup>a</sup>, Donghai Liu<sup>a</sup>, Zongchao Xu<sup>a</sup>, Liqun Zhang<sup>a</sup>, Li Liu<sup>b\*</sup>, Shipeng Wen<sup>a\*</sup>

a. Beijing Engineering Research Centre of Advanced Elastomers, Beijing University of Chemical Technology, Beijing 100029, China.

b. State Key Laboratory of Chemical Resource Engineering, Beijing University of Chemical Technology, Beijing 100029, China

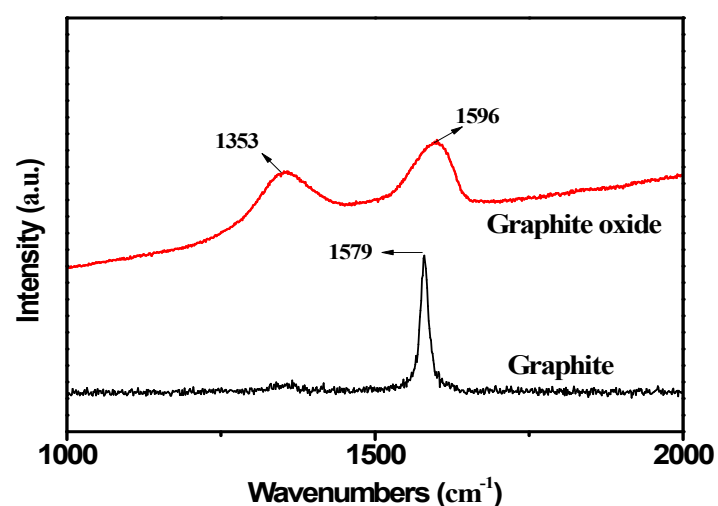

**Fig. S1** Raman patterns of graphite and graphene oxide

Raman spectra of graphite (black curve) and graphene oxide (GO, red curve) were performed and shown in Fig. S1. Highly ordered graphite had only a couple of Raman-active bands visible (G-band) in the spectra at 1579 cm<sup>-1</sup>. The Raman spectrum of GO showed the characteristic G-band at 1596 cm<sup>-1</sup> and D-band at 1353 cm<sup>-1</sup> respectively. The shift in the G-band towards longer wavenumbers (in comparison with the graphite) confirmed the oxygenation of graphite resulting in the formation of GO with several oxygenated functional groups such as carbonyl, carboxyl, hydroxyl, and epoxy groups.<sup>1</sup>

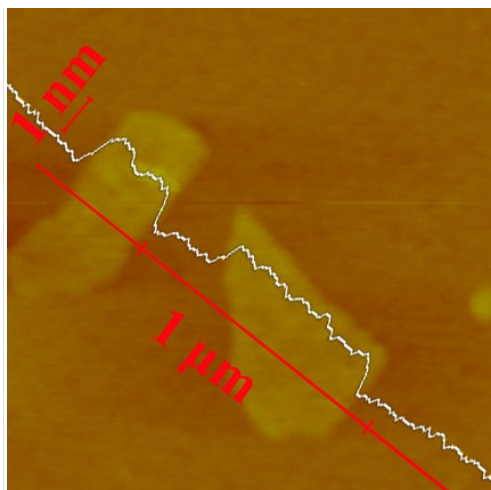

**Fig. S2** AFM images of graphene oxide

The thickness and width of GO were measured by atomic force microscope (AFM), as shown in Fig.S2. The thickness and width of GO sheets were about 1 nm and 1  $\mu\text{m}$ , respectively.

Table S1 Information obtained from the image analysis

| Sample                                       | No fatigue<br>(Fig.3A) | Fatigue for 20000<br>cycles (Fig.3B) | Fatigue for 50000<br>cycles (Fig.3C) |
|----------------------------------------------|------------------------|--------------------------------------|--------------------------------------|
| Number of detected<br>silica particles       | 676                    | 801                                  | 882                                  |
| Total area / $\text{nm}^2$                   | 7258341                | 7676435                              | 8075221                              |
| Average area of<br>particles / $\text{nm}^2$ | 11315                  | 10080                                | 8237                                 |
| Area fraction                                | 0.37                   | 0.40                                 | 0.42                                 |

### Notes and references

[1] M.Veerapandian, M.H.Lee, k.Krishnamoorthy, *Carbon*, 2012, **50**, 4228-4238.
